# Supplementary material for: Genomic aberrations in cell cycle genes predict progression of KIT-mutant gastrointestinal stromal tumors (GISTs)
Source: Clin Sarcoma Res. 2019 Mar 5;9:3. doi: 10.1186/s13569-019-0112-7 (PMC6399846; doi:10.1186/s13569-019-0112-7)
Supplement: Supplementary file 2 — Additional file 2: Table S4. KEGG pathways enrichment analysis results. [file 13569_2019_112_MOESM2_ESM.csv]

	summary.as.factor.pthwys..	pathname	pathgene	oddrat	orfisher	fisherp	genepathname	sample_num	genes
(Other)	267	Metabolic pathways - Homo sapiens (human)	0	-26.90471698	Inf	0	Metabolic pathways - Homo sapiens (human)	0
NA's	909	Metabolic pathways - Homo sapiens (human)	0	-69.76315789	Inf	0	Metabolic pathways - Homo sapiens (human)	0
1100	69	Metabolic pathways - Homo sapiens (human)	0	-22.5127186	Inf	5.08E-91	Metabolic pathways - Homo sapiens (human)	0
5220	15	Chronic myeloid leukemia - Homo sapiens (human)	73	5.557585156	4.919657012	2.91E-06	Chronic myeloid leukemia - Homo sapiens (human)	25	BCR,CBL,PIK3CA,BCL2L1,IKBKB,TP53,CDKN1B,GRB2,BRAF,CDKN2A,CDK4,RB1,E2F3,TGFBR1,MECOM
4380	20	Osteoclast differentiation - Homo sapiens (human)	132	3.844682479	3.402670308	1.02E-05	Osteoclast differentiation - Homo sapiens (human)	23	CSF1R,GRB2,PIK3CA,IFNGR1,IL1A,IL1R1,TGFBR1,TNFRSF11B,IKBKB,JUN,LILRB1,LILRB5,LILRB4,LILRA1,LILRA2,LILRA4,SIRPB1,SPI1,IFNAR2,CYLD
4510	26	Focal adhesion - Homo sapiens (human)	202	3.188002236	2.820713378	1.11E-05	Focal adhesion - Homo sapiens (human)	27	COL1A2,COL6A5,COL9A2,LAMA3,LAMA4,LAMC2,RELN,TNN,TNR,ITGA7,ITGB4,IGF1R,MET,SRC,ROCK2,MYLK2,MYLK3,TLN1,ZYX,VCL,CTNNB1,PIK3CA,VAV2,PAK2,JUN,BRAF,GRB2
5146	16	Amoebiasis - Homo sapiens (human)	100	4.092550216	3.622497185	3.87E-05	Amoebiasis - Homo sapiens (human)	32	IL1R1,MUC2,COL1A2,LAMA3,LAMA4,LAMC2,GNAQ,GNAS,PRKACG,TLR2,IL12A,VCL,ITGAM,PIK3CA,C8A
5215	14	Prostate cancer - Homo sapiens (human)	89	4.00586951	3.545922918	0.000139598	Prostate cancer - Homo sapiens (human)	23	CDKN1B,RB1,E2F3,IGF1R,PIK3CA,FOXO1,TP53,CREB3L1,CTNNB1,IKBKB,GRB2,BRAF,HSP90AA1,HSP90AB1
5200	37	Pathways in cancer - Homo sapiens (human)	397	2.222230835	1.964593229	0.000303475	Pathways in cancer - Homo sapiens (human)	39	CTNNB1,CTNNA2,WNT5A,WNT5B,ROCK2,GNAS,PRKACG,LAMA3,LAMA4,LAMC2,PIK3CA,IKBKB,BCL2L1,FOXO1,TP53,CDKN1B,BCR,CBL,GNAQ,RASGRP3,IGF1R,KIT,MET,GRB2,BRAF,JUN,CDK4,TPR,PLCG1,SPI1,CSF1R,CDKN2A,E2F3,MAX,RB1,TGFBR1,MECOM,MSH3,EGLN1,HSP90AA1,HSP90AB1,ETS1
5222	13	Small cell lung cancer - Homo sapiens (human)	86	3.819009195	3.380555095	0.00035753	Small cell lung cancer - Homo sapiens (human)	24	TP53,APAF1,MAX,CDK4,RB1,E2F3,LAMA3,LAMA4,LAMC2,PIK3CA,IKBKB,BCL2L1,CDKN1B
4110	16	Cell cycle - Homo sapiens (human)	124	3.180382518	2.814856556	0.000503671	Cell cycle - Homo sapiens (human)	34	CDK4,RB1,E2F3,CDKN2A,CDKN1B,CUL1,CCNB1,ANAPC1,CDC27,ANAPC5,BUB1,MAD2L2,ATM,TP53,GADD45A,ORC4
4512	12	ECM-receptor interaction - Homo sapiens (human)	82	3.67391635	3.252179348	0.000801759	ECM-receptor interaction - Homo sapiens (human)	23	COL1A2,COL6A5,COL9A2,LAMA3,LAMA4,LAMC2,RELN,TNN,TNR,HSPG2,ITGA7,ITGB4,HMMR
4010	25	MAPK signaling pathway - Homo sapiens (human)	255	2.339377546	2.06939606	0.001377123	MAPK signaling pathway - Homo sapiens (human)	26	CACNA1A,CACNA1E,CACNA1G,PRKACG,RASGRF2,RASGRP3,NF1,GRB2,RRAS2,BRAF,MKNK2,IL1A,IL1R1,TGFBR1,GADD45A,MAP4K3,PAK2,MAP3K12,JUN,TP53,MAX,PTPN7,MECOM,IKBKB
5214	10	Glioma - Homo sapiens (human)	65	3.892731414	3.44609546	0.001451466	Glioma - Homo sapiens (human)	21	IGF1R,PLCG1,GRB2,BRAF,PIK3CA,CDKN2A,TP53,CDK4,RB1,E2F3
5212	10	Pancreatic cancer - Homo sapiens (human)	66	3.823082764	3.384424638	0.001634794	Pancreatic cancer - Homo sapiens (human)	21	PIK3CA,IKBKB,BCL2L1,BRAF,CDKN2A,CDK4,RB1,E2F3,TP53,TGFBR1
5223	9	Non-small cell lung cancer - Homo sapiens (human)	56	4.097843283	3.627797681	0.001811212	Non-small cell lung cancer - Homo sapiens (human)	20	CDKN2A,CDK4,RB1,E2F3,PIK3CA,GRB2,BRAF,PLCG1,TP53,ALK
4914	12	Progesterone-mediated oocyte maturation - Homo sapiens (human)	98	2.988699266	2.645704671	0.003769374	Progesterone-mediated oocyte maturation - Homo sapiens (human)	31	PIK3CA,PRKACG,CPEB3,SPDYE1,HSP90AA1,HSP90AB1,CCNB1,IGF1R,BRAF,BUB1,MAD2L2,ANAPC1,CDC27,ANAPC5
4975	7	Fat digestion and absorption - Homo sapiens (human)	41	4.401203209	3.896941151	0.004043416	Fat digestion and absorption - Homo sapiens (human)	8	PNLIPRP1,CEL,PLA2G1B,SCARB1,NPC1L1,ABCG5,APOA4
4012	11	ErbB signaling pathway - Homo sapiens (human)	87	3.098864182	2.743122502	0.004242954	ErbB signaling pathway - Homo sapiens (human)	21	PLCG1,CBL,SRC,NCK1,PAK2,JUN,NRG1,GRB2,BRAF,PIK3CA,CDKN1B
4020	18	Calcium signaling pathway - Homo sapiens (human)	180	2.384347678	2.109838979	0.005343693	Calcium signaling pathway - Homo sapiens (human)	27	ATP2B1,GNAS,PRKACG,CACNA1A,CACNA1E,CACNA1G,GRIN2A,RYR1,RYR3,HTR2A,LHCGR,AVPR1A,GNAQ,PLCG1,ITPR2,MYLK2,MYLK3,ITPKB
2010	7	ABC transporters - Homo sapiens (human)	44	4.043918919	3.58022532	0.00604784	ABC transporters - Homo sapiens (human)	8	ABCA2,ABCA4,ABCA13,ABCB5,CFTR,ABCG4,ABCG5
4660	12	T cell receptor signaling pathway - Homo sapiens (human)	104	2.793188957	2.472363553	0.006097404	T cell receptor signaling pathway - Homo sapiens (human)	21	NCK1,VAV2,GRB2,PAK2,DLG1,PLCG1,JUN,CARD11,IKBKB,PIK3CA,CBL,CDK4
4060	24	Cytokine-cytokine receptor interaction - Homo sapiens (human)	265	2.140811342	1.89371447	0.006485941	Cytokine-cytokine receptor interaction - Homo sapiens (human)	31	CCL24,IL12A,PRL,IFNA16,IL1A,CXCR1,OSMR,PRLR,MET,CSF1R,KIT,IFNAR2,IFNGR1,TNFRSF10C,TNFRSF11B,TNFRSF8,EDAR,TGFBR1,ACVR2A,ACVR2B,ACVR1,ACVR1B,BMPR1A,IL1R1
4972	11	Pancreatic secretion - Homo sapiens (human)	96	2.769864116	2.451803428	0.008884798	Pancreatic secretion - Homo sapiens (human)	13	GNAQ,CPA1,PNLIPRP1,CEL,PLA2G1B,ITPR2,TPCN2,ATP2B1,GNAS,CFTR,SLC4A4
5218	9	Melanoma - Homo sapiens (human)	71	3.104777522	2.748533074	0.009107187	Melanoma - Homo sapiens (human)	22	MET,IGF1R,BRAF,CDK4,PIK3CA,CDKN2A,TP53,RB1,E2F3
4730	8	Long-term depression - Homo sapiens (human)	60	3.289205109	2.911908091	0.010116972	Long-term depression - Homo sapiens (human)	17	BRAF,GNAS,GNAQ,CACNA1A,ITPR2,RYR1,IGF1R
4520	9	Adherens junction - Homo sapiens (human)	74	2.961164935	2.621216282	0.011830034	Adherens junction - Homo sapiens (human)	11	SRC,IQGAP1,VCL,TJP1,CTNNB1,CTNNA2,IGF1R,MET,TGFBR1
5110	7	Vibrio cholerae infection - Homo sapiens (human)	51	3.399724518	3.009848043	0.013490674	Vibrio cholerae infection - Homo sapiens (human)	24	ATP6V1A,GNAS,PRKACG,CFTR,PLCG1,TJP1,MUC2
591	5	Linoleic acid metabolism - Homo sapiens (human)	29	4.448436712	3.938881568	0.013925337	Linoleic acid metabolism - Homo sapiens (human)	5	PLA2G1B,PLB1,ALOX15,CYP2J2
5219	6	Bladder cancer - Homo sapiens (human)	41	3.661771385	3.241949462	0.016024891	Bladder cancer - Homo sapiens (human)	20	BRAF,CDKN2A,TP53,CDK4,RB1,E2F3,SRC
4910	14	Insulin signaling pathway - Homo sapiens (human)	139	2.399256664	2.123348981	0.016795757	Insulin signaling pathway - Homo sapiens (human)	20	IRS1,PIK3CA,PRKACG,PRKAR1A,LIPE,CBL,FASN,FOXO1,TSC1,GRB2,BRAF,MKNK2,IKBKB
5211	8	Renal cell carcinoma - Homo sapiens (human)	66	2.948315077	2.609947568	0.017461981	Renal cell carcinoma - Homo sapiens (human)	20	EGLN1,MET,PIK3CA,GRB2,BRAF,JUN,PAK2,ETS1
5120	8	Epithelial cell signaling in Helicobacter pylori infection - Homo sapiens (human)	68	2.849835734	2.522848863	0.02059527	Epithelial cell signaling in Helicobacter pylori infection - Homo sapiens (human)	16	MET,PLCG1,TJP1,CXCR1,SRC,JUN,IKBKB,ATP6V1A
4530	13	Tight junction - Homo sapiens (human)	139	2.208439033	1.954535686	0.02966021	Tight junction - Homo sapiens (human)	12	CLDN9,PARD6G,LLGL2,TJP1,CTNNB1,CDK4,CGN,MYH1,MYH2,MYH7,RRAS2,CTNNA2,SRC
4662	8	B cell receptor signaling pathway - Homo sapiens (human)	73	2.630151047	2.328466675	0.030131366	B cell receptor signaling pathway - Homo sapiens (human)	10	VAV2,GRB2,RASGRP3,JUN,CARD11,IKBKB,PIK3CA,INPP5D
4971	8	Gastric acid secretion - Homo sapiens (human)	74	2.590208376	2.293046452	0.03234971	Gastric acid secretion - Homo sapiens (human)	7	GNAQ,ITPR2,MYLK2,MYLK3,GNAS,PRKACG,CFTR,SLC9A4
4930	6	Type II diabetes mellitus - Homo sapiens (human)	48	3.050719152	2.700953592	0.032566002	Type II diabetes mellitus - Homo sapiens (human)	9	IRS1,PIK3CA,IKBKB,CACNA1A,CACNA1E,CACNA1G
5210	7	Colorectal cancer - Homo sapiens (human)	62	2.718719008	2.406873057	0.035738632	Colorectal cancer - Homo sapiens (human)	18	CTNNB1,PIK3CA,BRAF,JUN,TGFBR1,MSH3,TP53
4360	12	Axon guidance - Homo sapiens (human)	127	2.23272607	1.976121772	0.037511722	Axon guidance - Homo sapiens (human)	15	NTN1,NCK1,ABLIM2,ROCK2,UNC5D,EFNA3,EPHA2,PAK2,SLIT3,ROBO1,SRGAP2,MET
4810	18	Regulation of actin cytoskeleton - Homo sapiens (human)	214	1.968350977	1.741479201	0.038754637	Regulation of actin cytoskeleton - Homo sapiens (human)	24	ITGA7,ITGAM,ITGB4,SRC,RRAS2,PIK3CA,VAV2,TIAM1,BRAF,PAK2,ROCK2,MYLK2,MYLK3,RDX,SSH3,VCL,IQGAP1,IQGAP2,IQGAP3
4630	14	Jak-STAT signaling pathway - Homo sapiens (human)	158	2.081281205	1.841746201	0.04128322	Jak-STAT signaling pathway - Homo sapiens (human)	12	IL12A,IFNA16,PRL,IL27RA,IFNAR2,IFNGR1,OSMR,PRLR,JAK3,STAT6,BCL2L1,GRB2,PIK3CA
5014	6	Amyotrophic lateral sclerosis (ALS) - Homo sapiens (human)	51	2.847035074	2.520544465	0.042155186	Amyotrophic lateral sclerosis (ALS) - Homo sapiens (human)	7	TP53,BCL2L1,APAF1,NEFH,ALS2,GRIN2A
4970	9	Salivary secretion - Homo sapiens (human)	89	2.404666161	2.128536704	0.045094874	Salivary secretion - Homo sapiens (human)	12	GNAS,PRKACG,GNAQ,ITPR2,RYR3,ATP2B1,MUC7,PRB2,DMBT1
5213	6	Endometrial cancer - Homo sapiens (human)	52	2.785044268	2.465677719	0.045706204	Endometrial cancer - Homo sapiens (human)	15	PIK3CA,GRB2,BRAF,CTNNB1,CTNNA2,TP53
5145	11	Toxoplasmosis - Homo sapiens (human)	118	2.198640741	1.946039055	0.052036745	Toxoplasmosis - Homo sapiens (human)	10	IFNGR1,HLA-DRB1,IKBKB,IL12A,BCL2L1,TLR2,LAMA3,LAMA4,LAMC2,PIK3CA
4270	11	Vascular smooth muscle contraction - Homo sapiens (human)	120	2.158145339	1.910203417	0.054592581	Vascular smooth muscle contraction - Homo sapiens (human)	21	AVPR1A,GNAQ,PLA2G1B,KCNU1,MYLK2,MYLK3,ITPR2,BRAF,ROCK2,GNAS,PRKACG
5100	8	Bacterial invasion of epithelial cells - Homo sapiens (human)	78	2.441849886	2.161622623	0.059976688	Bacterial invasion of epithelial cells - Homo sapiens (human)	9	CTNNB1,CTNNA2,MET,PIK3CA,SEPT9,SEPT11,CBL,SRC,MAD2L2,VCL
4621	6	NOD-like receptor signaling pathway - Homo sapiens (human)	57	2.511555417	2.223385951	0.066187686	NOD-like receptor signaling pathway - Homo sapiens (human)	7	IKBKB,NLRP1,CASP5,MEFV,HSP90AA1,HSP90AB1
5221	6	Acute myeloid leukemia - Homo sapiens (human)	57	2.511555417	2.223385951	0.066187686	Acute myeloid leukemia - Homo sapiens (human)	34	KIT,PIK3CA,IKBKB,GRB2,BRAF,SPI1
4962	5	Vasopressin-regulated water reabsorption - Homo sapiens (human)	44	2.736044843	2.422386398	0.069015786	Vasopressin-regulated water reabsorption - Homo sapiens (human)	6	GNAS,PRKACG,CREB3L1,DYNC1H1,DYNC2H1
4350	8	TGF-beta signaling pathway - Homo sapiens (human)	84	2.248593432	1.990518648	0.073719816	TGF-beta signaling pathway - Homo sapiens (human)	10	LTBP1,ACVR2A,ACVR2B,BMPR1A,ACVR1,TGFBR1,ACVR1B,CUL1
4210	12	Apoptosis - Homo sapiens (human)	140	2.005038023	1.77449566	0.076072164	Apoptosis - Homo sapiens (human)	12	TNFRSF10C,CASP10,DIABLO,APAF1,LMNB1,PARP1,PARP4,ITPR2,BCL2L1,JUN,TP53,IKBKB,GADD45A,ATM,PIK3CA
983	5	Drug metabolism - other enzymes - Homo sapiens (human)	46	2.602394746	2.304111394	0.080375809	Drug metabolism - other enzymes - Homo sapiens (human)	5	XDH,CES1,UGT2A1,UCK1
4540	8	Gap junction - Homo sapiens (human)	88	2.1358605	1.890750648	0.086029726	Gap junction - Homo sapiens (human)	8	GRB2,SRC,TJP1,GNAS,PRKACG,HTR2A,GNAQ,ITPR2
4115	7	p53 signaling pathway - Homo sapiens (human)	69	2.411168133	2.134679715	0.086369566	p53 signaling pathway - Homo sapiens (human)	16	ATM,CDKN2A,TP53,CDK4,CCNB1,GADD45A,APAF1
4670	10	Leukocyte transendothelial migration - Homo sapiens (human)	118	1.978683315	1.751333183	0.090503932	Leukocyte transendothelial migration - Homo sapiens (human)	16	ITGAM,CLDN9,PIK3CA,CTNNB1,CTNNA2,PLCG1,ROCK2,VCL,RAPGEF3,VAV2
4976	7	Bile secretion - Homo sapiens (human)	71	2.335653409	2.067688301	0.091330241	Bile secretion - Homo sapiens (human)	8	SLCO1B1,SCARB1,ABCG5,GNAS,PRKACG,CFTR,SLC4A4
5140	7	Leishmaniasis - Homo sapiens (human)	73	2.264715335	2.004878794	0.097152998	Leishmaniasis - Homo sapiens (human)	7	TLR2,IL1A,IL12A,ITGAM,JUN,IFNGR1,HLA-DRB1
510	5	N-Glycan biosynthesis - Homo sapiens (human)	49	2.424700866	2.146706787	0.099153611	N-Glycan biosynthesis - Homo sapiens (human)	6	ALG12,MAN2A1,MAN2A2,B4GALT2,ST6GAL2
5142	9	Chagas disease (American trypanosomiasis) - Homo sapiens (human)	104	2.023903842	1.791464419	0.108990755	Chagas disease (American trypanosomiasis) - Homo sapiens (human)	8	TLR2,JUN,IKBKB,IL12A,IFNGR1,GNAQ,GNAS,PIK3CA,TGFBR1
590	6	Arachidonic acid metabolism - Homo sapiens (human)	62	2.286903861	2.024610888	0.13166998	Arachidonic acid metabolism - Homo sapiens (human)	9	PLA2G1B,PLB1,PTGES2,CYP4F2,CYP2J2,ALOX15
4974	8	Protein digestion and absorption - Homo sapiens (human)	90	2.08361841	1.844340145	0.138477547	Protein digestion and absorption - Homo sapiens (human)	16	CPA1,SLC7A9,COL1A2,COL11A1,COL6A5,COL9A2,COL12A1,COL14A1,COL15A1
4912	8	GnRH signaling pathway - Homo sapiens (human)	91	2.058441499	1.822087416	0.140422216	GnRH signaling pathway - Homo sapiens (human)	7	GNAS,PRKACG,GNAQ,ITPR2,SRC,JUN,GRB2
4114	10	Oocyte meiosis - Homo sapiens (human)	123	1.890794982	1.673503736	0.141347325	Oocyte meiosis - Homo sapiens (human)	27	IGF1R,PRKACG,CPEB3,SPDYE1,CUL1,ANAPC1,CDC27,ANAPC5,BUB1,MAD2L2,ITPR2,CCNB1
830	6	Retinol metabolism - Homo sapiens (human)	65	2.170389664	1.921474809	0.143017054	Retinol metabolism - Homo sapiens (human)	13	ADH4,ADH5,ALDH1A2,UGT2A1,RETSAT
4720	6	Long-term potentiation - Homo sapiens (human)	66	2.134140802	1.889404001	0.147335892	Long-term potentiation - Homo sapiens (human)	17	PRKACG,RAPGEF3,GRIN2A,BRAF,ITPR2,GNAQ
10	6	Glycolysis / Gluconeogenesis - Homo sapiens (human)	67	2.099080428	1.858394737	0.151910242	Glycolysis / Gluconeogenesis - Homo sapiens (human)	14	GAPDHS,PGAM2,PDHA2,DLD,ADH4,ADH5
4664	6	Fc epsilon RI signaling pathway - Homo sapiens (human)	68	2.065151034	1.828192164	0.156732432	Fc epsilon RI signaling pathway - Homo sapiens (human)	14	INPP5D,PLCG1,PIK3CA,VAV2,GRB2
982	6	Drug metabolism - cytochrome P450 - Homo sapiens (human)	69	2.032298764	1.799159791	0.161794768	Drug metabolism - cytochrome P450 - Homo sapiens (human)	13	CYP2D6,FMO3,ADH4,ADH5,UGT2A1
4916	8	Melanogenesis - Homo sapiens (human)	100	1.856478887	1.643288945	0.167073906	Melanogenesis - Homo sapiens (human)	27	GNAS,PRKACG,CREB3L1,WNT5A,WNT5B,GNAQ,CTNNB1,KIT
4622	6	RIG-I-like receptor signaling pathway - Homo sapiens (human)	70	2.000473126	1.770977639	0.167089534	RIG-I-like receptor signaling pathway - Homo sapiens (human)	5	IFNA16,CASP10,IKBKB,IL12A,CYLD,RNF125
4640	7	Hematopoietic cell lineage - Homo sapiens (human)	88	1.844341564	1.632627452	0.214626295	Hematopoietic cell lineage - Homo sapiens (human)	26	IL1A,KIT,CD2,CSF1R,ITGAM,IL1R1,HLA-DRB1
5414	7	Dilated cardiomyopathy - Homo sapiens (human)	90	1.799771815	1.59315671	0.222744016	Dilated cardiomyopathy - Homo sapiens (human)	9	ITGA7,ITGB4,TTN,MYBPC3,GNAS,PRKACG,MYH7
3040	10	Spliceosome - Homo sapiens (human)	134	1.722389595	1.52436895	0.228495273	Spliceosome - Homo sapiens (human)	16	DDX46,PRPF18,RBM25,SF3A2,SF3A3,SF3B2,SF3B3,U2AF2,SNRNP200,RBMXL1
4650	10	Natural killer cell mediated cytotoxicity - Homo sapiens (human)	135	1.708549734	1.512113999	0.23039889	Natural killer cell mediated cytotoxicity - Homo sapiens (human)	16	VAV2,PLCG1,PIK3CA,GRB2,BRAF,RAET1G,IFNGR1,IFNA16,IFNAR2,TNFRSF10C
4120	10	Ubiquitin mediated proteolysis - Homo sapiens (human)	137	1.681523864	1.488183334	0.234706724	Ubiquitin mediated proteolysis - Homo sapiens (human)	26	UBE2J2,BIRC6,NEDD4L,CBL,CUL1,FBXO2,CUL4A,ANAPC1,CDC27,ANAPC5
4370	5	VEGF signaling pathway - Homo sapiens (human)	61	1.904311649	1.685909429	0.235229777	VEGF signaling pathway - Homo sapiens (human)	11	SH2D2A,PLCG1,SRC,PIK3CA
4514	10	Cell adhesion molecules (CAMs) - Homo sapiens (human)	142	1.617542164	1.431530482	0.248249535	Cell adhesion molecules (CAMs) - Homo sapiens (human)	12	CD2,HLA-DRB1,CLDN9,ITGAM,CDH2,NCAM2,NRXN1,NRCAM,NFASC,NEO1
4310	10	Wnt signaling pathway - Homo sapiens (human)	143	1.605323103	1.420711208	0.251407625	Wnt signaling pathway - Homo sapiens (human)	17	WNT5A,WNT5B,NOTUM,CTNNB1,JUN,PRKACG,TP53,TBL1XR1,CUL1,PRICKLE2,ROCK2
4080	18	Neuroactive ligand-receptor interaction - Homo sapiens (human)	277	1.486218074	1.314552997	0.267007945	Neuroactive ligand-receptor interaction - Homo sapiens (human)	19	HTR2A,NMBR,MC3R,AVPR1A,PLG,LHCGR,P2RY2,P2RY13,S1PR5,PTH2R,GRM4,GRM7,GRIN2A,CHRNA5,GRIK1,GRIK3,PRL,PRLR
4610	6	Complement and coagulation cascades - Homo sapiens (human)	79	1.753279479	1.55206979	0.294352083	Complement and coagulation cascades - Homo sapiens (human)	9	F5,F13B,PLG,SERPINA1,C8A,ITGAM,SERPING1
4742	6	Taste transduction - Homo sapiens (human)	83	1.661964077	1.471212473	0.313695748	Taste transduction - Homo sapiens (human)	7	PRKACG,GRM4,TAS2R31,PKD2L1,HCN4,CACNA1A,ASIC2
5160	9	Hepatitis C - Homo sapiens (human)	133	1.548974497	1.370905443	0.320423729	Hepatitis C - Homo sapiens (human)	19	SCARB1,CLDN9,IKBKB,IFNA16,IFNAR2,GRB2,BRAF,PIK3CA,TP53
4070	7	Phosphatidylinositol signaling system - Homo sapiens (human)	98	1.641083916	1.452637115	0.347300309	Phosphatidylinositol signaling system - Homo sapiens (human)	17	PIK3CA,INPP5D,PLCG1,ITPKB,INPP1,DGKZ,ITPR2
4062	12	Chemokine signaling pathway - Homo sapiens (human)	187	1.464091255	1.295488591	0.397805362	Chemokine signaling pathway - Homo sapiens (human)	19	CCL24,CXCR1,JAK3,PRKACG,SRC,GRB2,BRAF,PIK3CA,IKBKB,VAV2,ROCK2,DOCK2,TIAM1
4722	8	Neurotrophin signaling pathway - Homo sapiens (human)	120	1.523881729	1.348774674	0.39821635	Neurotrophin signaling pathway - Homo sapiens (human)	17	GRB2,BRAF,PIK3CA,IRS1,PLCG1,JUN,TP53,IKBKB
562	5	Inositol phosphate metabolism - Homo sapiens (human)	71	1.615206528	1.429897889	0.407873543	Inositol phosphate metabolism - Homo sapiens (human)	16	PIK3CA,INPP5D,PLCG1,ISYNA1,INPP1,ITPKB
4666	6	Fc gamma R-mediated phagocytosis - Homo sapiens (human)	93	1.470411653	1.301609808	0.473695828	Fc gamma R-mediated phagocytosis - Homo sapiens (human)	15	PIK3CA,PLCG1,VAV2,DOCK2,ASAP1,INPP5D
564	6	Glycerophospholipid metabolism - Homo sapiens (human)	95	1.437266626	1.272259404	0.481957384	Glycerophospholipid metabolism - Homo sapiens (human)	7	AGPAT9,DGKZ,PLA2G1B,PLB1,PNPLA7,CHAT,LPGAT1
4620	7	Toll-like receptor signaling pathway - Homo sapiens (human)	106	1.508042547	1.334845453	0.498664558	Toll-like receptor signaling pathway - Homo sapiens (human)	6	TLR2,PIK3CA,IKBKB,JUN,IL12A,IFNA16,IFNAR2
4145	9	Phagosome - Homo sapiens (human)	154	1.3236513	1.171389919	0.579136899	Phagosome - Homo sapiens (human)	18	HLA-DRB1,ATP6V1A,DYNC1H1,DYNC2H1,ITGAM,SFTPA2,TLR2,PLA2R1,CD209,SCARB1
230	10	Purine metabolism - Homo sapiens (human)	175	1.292515129	1.143730961	0.603670122	Purine metabolism - Homo sapiens (human)	12	PAICS,ATIC,ENTPD6,XDH,POLR1B,POLR3A,POLR3E,POLR3F,GUCY2D,PAPSS2,PAPSS1
4146	5	Peroxisome - Homo sapiens (human)	83	1.366131347	1.209355093	0.61219657	Peroxisome - Homo sapiens (human)	4	PEX26,ACSL6,SOD2,XDH
5016	11	Huntington's disease - Homo sapiens (human)	193	1.289162965	1.140674968	0.619582368	Huntington's disease - Homo sapiens (human)	18	HTT,GNAQ,DLG4,DNAH1,DNAH2,DNAH7,DNAH6,DNAH12,DNAH10,DNAH17,CREB3L1,SOD2,TP53,NDUFV2,NDUFS1,APAF1
5010	7	Alzheimer's disease - Homo sapiens (human)	168	0.925263505	0.81877672	0.724978342	Alzheimer's disease - Homo sapiens (human)	8	NDUFV2,NDUFS1,APAF1,GNAQ,GRIN2A,RYR3,ITPR2
4144	14	Endocytosis - Homo sapiens (human)	259	1.218888043	1.078153408	0.774256657	Endocytosis - Homo sapiens (human)	29	TGFBR1,IGF1R,MET,KIT,CSF1R,CBL,NEDD4L,DAB2,CXCR1,WIPF3,CHMP5,SRC,PARD6G,ASAP1,ARAP1,ARFGEF2
4740	19	Olfactory transduction - Homo sapiens (human)	415	1.021808297	0.903217596	0.820486248	Olfactory transduction - Homo sapiens (human)	16	OR4M1,OR5M1,OR8U1,OR52B2,OR1J4,OR5L2,OR9G4,OR4L1,OR2M5,OR14C36,OR10X1,OR6C76,OR4N2,OR6Y1,OR2AK2,OR5AC2,OR6P1,OR5H1,OR5B2,ANO2,GUCY2D,PRKACG
4141	9	Protein processing in endoplasmic reticulum - Homo sapiens (human)	169	1.198918816	1.06096612	0.858925347	Protein processing in endoplasmic reticulum - Homo sapiens (human)	10	SEC24D,ERP29,DERL2,HSP90AA1,HSP90AB1,UBE2J2,AMFR,CUL1,FBXO2
3013	9	RNA transport - Homo sapiens (human)	172	1.176727147	1.041300661	0.860519886	RNA transport - Homo sapiens (human)	12	TPR,NUP50,NUP188,NUP210L,NUP214,AAAS,EIF2S2,EIF5B,SRRM1
240	5	Pyrimidine metabolism - Homo sapiens (human)	104	1.075543636	0.952033091	1	Pyrimidine metabolism - Homo sapiens (human)	8	ENTPD6,POLR1B,POLR3A,POLR3E,POLR3F,UCK1
